CORRECTION

# Correction: Cerebral Glioma Grading Using Bayesian Network with Features Extracted from Multiple Modalities of Magnetic Resonance Imaging

Jisu Hu, Wenbo Wu, Bin Zhu, Huiting Wang, Renyuan Liu, Xin Zhang, Ming Li, Yongbo Yang, Jing Yan, Fengnan Niu, Chuanshuai Tian, Kun Wang, Haiping Yu, Weibo Chen, Suiren Wan, Yu Sun, Bing Zhang

There is an error in affiliation 1 for authors Jisu Hu, Suiren Wan, and Yu Sun. Affiliation 1 should be: State Key Laboratory of Bioelectronics, Laboratory for Medical Electronics, School of Biological Sciences and Medical Engineering, Southeast University, Nanjing, Jiangsu, China.

## Reference

1. Hu J, Wu W, Zhu B, Wang H, Liu R, Zhang X, et al. (2016) Cerebral Glioma Grading Using Bayesian Network with Features Extracted from Multiple Modalities of Magnetic Resonance Imaging. PLoS ONE 11(4): e0153369. doi: [10.1371/journal.pone.0153369](https://doi.org/10.1371/journal.pone.0153369) PMID: [27077923](https://pubmed.ncbi.nlm.nih.gov/27077923/)

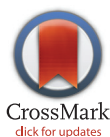

## OPEN ACCESS

**Citation:** Hu J, Wu W, Zhu B, Wang H, Liu R, Zhang X, et al. (2016) Correction: Cerebral Glioma Grading Using Bayesian Network with Features Extracted from Multiple Modalities of Magnetic Resonance Imaging. PLoS ONE 11(6): e0157095. doi:10.1371/journal.pone.0157095

**Published:** June 2, 2016

**Copyright:** © 2016 Hu et al. This is an open access article distributed under the terms of the [Creative Commons Attribution License](https://creativecommons.org/licenses/by/4.0/), which permits unrestricted use, distribution, and reproduction in any medium, provided the original author and source are credited.
